---

1 **Polymerase chain reaction-based assays facilitate the breeding and study of mouse**  
2 **models of Klinefelter syndrome**

3 Haixia Zhang <sup>1§</sup>, Wenyan Xu <sup>1§</sup>, Yulin Zhou <sup>1§</sup>, Xiaolu Chen <sup>1</sup>, Jiayang Jiang <sup>2</sup>, Xiaoman  
4 Zhou <sup>1</sup>, Zengge Wang <sup>3</sup>, Rongqin Ke <sup>2</sup>, and Qiwei Guo <sup>1\*</sup>

5 <sup>1</sup>United Diagnostic and Research Center for Clinical Genetics, Women and Children's  
6 Hospital, School of Medicine & School of Public Health, Xiamen University. Xiamen,  
7 Fujian 361102, China

8 <sup>2</sup>School of Biomedical Sciences & School of Medicine, Huaqiao University, Quanzhou,  
9 Fujian 362021, China

10 <sup>3</sup>Beijing Children's Hospital, Capital Medical University, Beijing 100045, China

11 <sup>§</sup>These authors contributed equally to this work.

12 **\*Correspondence to:** Qiwei Guo, United Diagnostic and Research Center for Clinical  
13 Genetics, Women and Children's Hospital, School of Medicine & School of Public  
14 Health, Xiamen University. Xiamen, Fujian 361102, China

15 Email: [guoqiwei@xmu.edu.cn](mailto:guoqiwei@xmu.edu.cn)

16 Running title: PCR assays for breeding and study of KS mouse

17

---

18 **Abstract**

19 Klinefelter syndrome (KS) is one of the most frequent genetic abnormalities and the  
20 leading genetic cause of non-obstructive azoospermia. The breeding of mouse models of  
21 KS and their study are essential to advance our knowledge of the pathologic mechanism.  
22 Karyotyping and fluorescence *in situ* hybridization are reliable methods for identifying  
23 chromosomal contents. However, technical issues associated with these methods can  
24 decrease the efficiency of breeding KS mouse models and limit studies that require  
25 rapid identification of target mice. To overcome these limitations, we developed three  
26 polymerase chain reaction-based assays to measure the specific genetic information,  
27 including the presence or absence of *Sry*, copy number of *Amelx*, and Xist RNA  
28 transcript levels. Through a combined analysis of the assay results, we can infer the  
29 karyotype of target mice. We confirmed the utility of our assays with the successful  
30 generation of KS mouse models. Our assays are rapid, inexpensive, high capacity, easy  
31 to perform, and require small amounts of sample. Therefore, they facilitate the breeding  
32 and study of KS mouse models and help advance our knowledge of the pathologic  
33 mechanism underlying KS.

34 **Keywords:**

35 Klinefelter syndrome; mouse model; 40,XX<sup>Y\*</sup> mouse; 41,XXY mouse

---

36 **Introduction**

37 Klinefelter syndrome (KS), a set of symptoms that results from an extra X chromosome  
38 in males, is one of the most frequent genetic abnormalities and the leading genetic cause  
39 of non-obstructive azoospermia.<sup>1</sup> The prevalence of KS in newborn, infertile, and  
40 azoospermic males is approximately 0.15%, 3–4%, and 10–12%, respectively.<sup>2,3</sup> The  
41 phenotypic spectrum of KS is wide, ranging from presenting only small testes and  
42 infertility to the classical traits and comorbidities such as hypergonadotropic  
43 hypogonadism, infertility, neurocognitive deficits, psychiatric disorders, obesity,  
44 diabetes, osteoporosis, and autoimmune disorders.<sup>4</sup> Early diagnosis of KS and  
45 subsequent treatment and intervention, such as testosterone replacement therapy,  
46 testicular sperm extraction, early speech and occupation therapy, and educational  
47 assistance, have been shown to improve the long-term quality of life for patients with  
48 KS and alleviate later complications.<sup>5-10</sup> However, the data was limited and more  
49 rigorous scientific investigations are needed.<sup>11</sup> In fact, the pathologic mechanism  
50 between abovementioned phenotypes and the extra X chromosome is much more  
51 complicated than previously envisioned and remain largely unknown, in large part  
52 because in-depth investigations, such as developmental studies and experimental  
53 manipulations, are almost impossible to perform in patients with KS for ethical reasons.  
54<sup>11, 12</sup> Therefore, studies of animal models are essential to advance our knowledge of the  
55 pathologic mechanism of this prevalent syndrome.<sup>12</sup>

56 The discovery of a mutant mouse line, the Y\* mouse, has enabled us to generate KS  
57 mouse models.<sup>13</sup> As shown in Fig. 1, the Y\* chromosome contains the X-centromere,

---

58 partial pseudoautosomal region (PAR) of the X chromosome, partial PAR of the Y  
59 chromosome, and the entire non-recombining region of the Y chromosome (NRY). In  
60 addition, a small fragment of the non-pseudoautosomal region of the X chromosome  
61 (NPX), containing eight genes including *Amelx*, is located between the X-centromere  
62 and the duplicated PAR. Through cross-breeding, 40,XX<sup>Y\*</sup> and 41,XXY mice could be  
63 generated in the second and fourth generations, respectively.<sup>14</sup> These two mouse breeds  
64 have many of the characteristics of KS, including small firm testes, germ cell loss,  
65 hypergonadotropic hypogonadal endocrine changes, altered body proportions,  
66 behavioral and cognitive issues, and so on.<sup>12, 14</sup> Therefore, these mouse breeds have  
67 been widely used as animal models to overcome the limitations of human studies to  
68 explore the pathological mechanisms underlying KS.<sup>15, 16</sup>

69       One of the most important steps in the successful breeding of 40,XX<sup>Y\*</sup> and 41,XXY  
70 mice is the accurate identification of the karyotypes and chromosomal fragments of the  
71 targeted mouse breeds (Fig. 1). This is typically performed through cytogenetic methods,  
72 such as karyotyping or fluorescence *in situ* hybridization (FISH). To ensure that the  
73 mice are alive for subsequent breeding after testing, culture cells derived from blood  
74 samples or tissue biopsies are used.<sup>17</sup> However, identification of target mice by  
75 karyotyping or FISH is labor-intensive, time-consuming (5–10 days), and requires a  
76 relatively high level of expertise. These drawbacks reduce their usefulness of large-scale  
77 detection, which is generally required to generate enough model mice for study use.  
78 Moreover, the pathological changes in the KS model mice, such as germ cell loss, occur  
79 prenatally and progress rapidly after birth.<sup>15, 18</sup> Therefore, studies of these early

---

80 pathological changes require immediate identification of target mice prenatally or  
81 neonatally; this poses a challenge for karyotyping and FISH, which require a relatively  
82 long turnaround time.

83 To overcome these limitations, we developed three polymerase chain reaction  
84 (PCR)-based assays to identify the chromosomal contents of target mice and confirmed  
85 the utility of our assays for reliable breeding of KS mouse models.

## 86 **Materials and Methods**

### 87 **Study design**

88 As shown in Fig. 1, each karyotype has specific sex chromosome contents that could  
89 provide specific genetic information such as gene copy number and transcriptional  
90 activity. Theoretically, by analyzing this genetic information using molecular methods,  
91 instead of cytogenetic analyses such as karyotyping and FISH, we would be able to  
92 infer the karyotype of a mouse breed. Based on this concept, three genes, *Sry*, *Amelx*,  
93 and *Xist*, could be informative. *Sry* is located in the NRY, and its presence or absence  
94 determines the gender of the mouse. Since *Amelx* is located in the NPX and is also  
95 present on the Y\* chromosome, the copy number of *Amelx* implies the copy number of  
96 the NPX fragment.<sup>19</sup> *Xist* is also located on the NPX and is transcribed into a long  
97 noncoding RNA that can transcriptionally silence one of the two X chromosomes to  
98 achieve dosage equivalence between males and females. Thus, a high level of *Xist* RNA  
99 is expected when there are two X chromosomes in a single cell, whereas an absence or  
100 low level of *Xist* RNA is expected when there is only one X chromosome in a single  
101 cell.<sup>20</sup> Corresponding to the breeding protocol shown in Fig. 1, the genetic information

---

102 of the mouse breeds in each generation is shown in Fig. 2. This genetic information was  
103 determined using the PCR-based assays designed to measure the presence or absence of  
104 *Sry*, copy number of *Amelx*, and the transcript levels of Xist RNA. Notably, the  
105 combined information for two genes was sufficient to identify a target karyotype (Fig.  
106 2).

### 107 **Mice and samples**

108 To establish the PCR assays, tail tissue samples from 16 pairs of 40,XX and 40,XY  
109 mice (C57BL/6J) were obtained from the Experimental Teaching Department, School of  
110 Medicine, Xiamen University. To generate 40,XX<sup>Y\*</sup> and 41,XXY mice, breeding pairs  
111 of 40,XY\* (C57BL/6JEiJ) and 40,XX (C57BL/6J) mice were purchased from The  
112 Jackson Laboratory (Bar Harbor, ME, USA). The 40,XY mice (C57BL/6J) were  
113 purchased from Xiamen University Laboratory Animal Center. The breeding was  
114 performed in the standard animal facility of the Xiamen University Laboratory Animal  
115 Center.

### 116 **Nucleic acid purification**

117 Approximately 20 mg of tail tissue was used to purify DNA or RNA with the QIAamp  
118 Fast DNA Tissue Kit (Qiagen, Valencia, CA, USA) or the RNeasy<sup>®</sup> mini Kit (Qiagen),  
119 respectively, according to the manufacturer's protocols. The purity and concentration of  
120 the purified nucleic acid were determined by measuring the absorbance at 260 nm and  
121 280 nm using a NanoDrop 2000 spectrophotometer (Thermo Fisher, Waltham, MA,  
122 USA).

### 123 **Reaction conditions**

---

124 The PCR conditions for all assays were identical: each 25  $\mu$ L reaction contained 10  
125 mmol/L Tris-HCl (pH 8.3), 50 mmol/L KCl, 1 U of TaqHS (Takara, Dalian, China), 2  
126 mmol/L  $Mg^{2+}$ , 0.2 mmol/L each dNTP, 0.8 $\times$  LightCycler 480 ResoLight Dye (Roche  
127 Applied Science GmbH, Mannheim, Germany), 0.2 mmol/L each forward and reverse  
128 primer, and a specific amount of DNA or cDNA template. The amplification cycling  
129 conditions were as follows: 95  $^{\circ}$ C for 3 min, followed by 40 cycles of 95  $^{\circ}$ C for 20 s,  
130 60  $^{\circ}$ C for 20 s, and 72  $^{\circ}$ C for 20 s. Fluorescence was recorded at the end of each  
131 annealing step. The sequences of the primers used in each assay are listed in Table 1.  
132 For the measurement of *Sry*, a melting analysis was performed after the amplification,  
133 which began with denaturation at 95  $^{\circ}$ C for 1 min and renaturation at 35  $^{\circ}$ C for 3 min,  
134 followed by melting from 40  $^{\circ}$ C to 95  $^{\circ}$ C, with a ramp rate of 0.04  $^{\circ}$ C/s. Fluorescence  
135 was recorded every 0.3  $^{\circ}$ C. PCR and melting analysis were performed on a SLAN-96S  
136 thermocycler (Zeesan, Xiamen, China). Before PCR, RNA samples were reverse  
137 transcribed with the GoScript Reverse Transcription System (Promega, Beijing, China)  
138 according to the manufacturer's protocol, and 1  $\mu$ L of the resulting cDNA was used as  
139 template for subsequent PCR.

#### 140 **Data analysis**

141 For the analysis of *Sry*, a melting profile was used to determine its presence or absence.  
142 To quantify the copy number of *Amelx*, relative quantification was performed by  
143 measuring the difference between the quantification cycle (Cq) values obtained for  
144 *Amelx* and *Actb* ( $\Delta Cq_{Amelx - Actb}$ ). Similarly, to evaluate *Xist* RNA transcript levels,  
145 relative quantification was performed by measuring the difference between the Cq

---

146 values for the *Xist* and *Actb* transcripts ( $\Delta Cq_{Xist - Actb}$ ). *Actb* was used as a quantitative  
147 reference because it has consistently has two copies and a stable transcriptional pattern  
148 in mouse cells. The Cq value is defined as the amplification cycle when the  
149 fluorescence intensity of an amplicon reaches a specific threshold.<sup>21</sup> Based on a  
150 previous study, the threshold was set to 30% of the plateau fluorescence intensity as the  
151 optimal Cq value for differentiation of different karyotypes.<sup>22</sup>

### 152 **Karyotyping and histologic analysis**

153 To confirm the accuracy of our assays, after breeding, the karyotypes of the target mice  
154 were examined by karyotyping using hemopoietic lineage cells derived from the bone  
155 marrow according to a previous protocol.<sup>17</sup> For histologic analysis of the testes of KS  
156 model mice, periodic acid-Schiff staining was performed on cross-sections of the  
157 seminiferous tubules according to a previous protocol.<sup>23</sup>

### 158 **Ethics statement**

159 Mouse breeding and experimentation were performed in accordance with international,  
160 national, and institutional guidelines for the ethical use of animals.<sup>24</sup> The study was  
161 approved by the Ethics Committee of Xiamen University Laboratory Animal Center.

## 162 **Results**

### 163 **Establishing an assay for the detection of *Sry***

164 To determine the optimal amount of DNA template for the *Sry* detection assay, serial  
165 dilutions of DNA isolated from 40,XY (*Sry* positive) and 40,XX (*Sry* negative) mice  
166 were evaluated. A no template control was also examined to determine the melting  
167 profiles of primer dimers. As shown in Fig. 3A, the melting profiles changed with the



---

168 amount of DNA template. To obtain only the *Sry* amplicon, at least 2 ng of DNA  
169 template was required for samples from the 40,XY mouse. However, for the 40,XX  
170 mouse samples, the use of a larger amount of DNA template ( $\geq 20$  ng) generated  
171 non-specific amplicons that presented similar melting profiles to those of the *Sry*  
172 amplicons. Therefore, 2 ng was considered as the optimal amount of template to  
173 specifically detect the presence or absence of *Sry* and was used for subsequent  
174 experiments.

### 175 **Establishing an assay for quantification of *Amelx***

176 We first evaluated the influence of the amount of DNA template on the effectiveness of  
177 the *Amelx* quantification assay by examining serial dilutions of DNA isolated from a  
178 40,XX mouse as a template. As shown in Fig. 3B, amplification in both the *Amelx* and  
179 *Actb* detection reactions was robust across a wide range of template concentrations (20  
180 pg–200 ng). However, a repressive effect was observed when a relatively large amount  
181 of DNA template ( $\geq 20$  ng) was used. Therefore, 2 ng was chosen as the amount of  
182 template to evaluate the ranges of the  $\Delta Cq_{Amelx - Actb}$  values for the 40,XX (two copies of  
183 *Amelx*) and 40,XY (one copy of *Amelx*) mouse samples. As shown in Fig. 3C, the ranges  
184 for 16 samples from 40,XX and 40,XY mice were distinct from each other. The mean  
185  $\Delta Cq_{Amelx - Actb}$  value (1.65) of the maximum of the 40,XX samples and the minimum of  
186 the 40,XY samples was used as the cut-off value for classifying mice as having one or  
187 two copies of *Amelx* in subsequent experiments.

### 188 **Establishing an assay for evaluating *Xist* RNA transcript levels**

189 We first evaluated the influence of different amounts (2000, 200, and 20 ng) of RNA

---

190 template from a 40,XX mouse (high level of Xist RNA transcripts) in a reverse  
191 transcription reaction on PCR effectiveness. As shown in Fig. 3D, both 2 000 ng and  
192 200 ng of RNA had a repressive effect. Therefore, 20 ng of RNA template was used for  
193 reverse transcription to evaluate the range of the  $\Delta Cq_{Xist - Actb}$  values for 40,XX and  
194 40,XY mouse samples (no or low level of Xist RNA transcript). As shown in Fig. 3E,  
195 the range of the  $\Delta Cq_{Xist - Actb}$  values for the 16 40,XX and 40,XY mouse samples were  
196 distinct from each other. The mean  $\Delta Cq_{Xist - Actb}$  value (6.05) of the maximum for the  
197 40,XX samples and the minimum for the 40,XY samples was used as the cut-off value  
198 for differentiating Xist RNA transcript levels in subsequent experiments.

#### 199 **Breeding KS mouse models using these PCR assays**

200 Using the established PCR assays, we bred 40,XX<sup>Y\*</sup> and 41,XXY mice from a pair of  
201 40,XY\* and 40,XX mice following the protocol in Fig. 1, which confirmed the  
202 effectiveness of our method. Ultimately, we obtained one 40,XX<sup>Y\*</sup> mouse and four  
203 41,XXY mice. Subsequent karyotyping and histological analysis confirmed the  
204 reliability of our assays (Figs. 4 and 5).

#### 205 **Discussion**

206 Karyotyping and FISH are reliable methods that have been used for decades to identify  
207 chromosomal abnormalities, which are essential for the breeding and study of KS  
208 mouse models. However, these methods have some technical issues, e.g., a relatively  
209 low capacity and long turnaround time, that decrease the breeding efficiency and limit  
210 studies which require rapid identification of chromosomal contents.

211 PCR is a basic tool of the molecular laboratory that has demonstrated capability for

---

212 detecting various types of genetic abnormalities through different data analysis  
213 strategies. For example, we can detect the presence or absence of a specific gene region  
214 (e.g., *AZF* on the Y chromosome) by analyzing amplification profiles,<sup>25</sup> and we can  
215 detect numerical changes (e.g., trisomy 21, 47,XXY, or a *SMA* carrier) by analyzing  
216 melting profiles or  $\Delta Cq$  values.<sup>5, 22, 26-28</sup> Based on previous studies, we developed three  
217 PCR-based assays to detect genetic information related to KS, including the presence or  
218 absence of *Sry*, changes in the copy number of *Amelx*, and *Xist* RNA transcript levels in  
219 mouse tissue samples. Using these assays, we were able to identify target mice for the  
220 breeding of KS models without performing karyotyping or FISH (Figs. 1 and 2).  
221 Compared to karyotyping or FISH, our method is rapid, as it takes less than 1 h for  
222 nucleic acid purification, less than 2 h for reverse transcription, and less than 2 h for  
223 PCR and melting analysis. A short turnaround time for mouse identification is essential  
224 for studies focused on rapid physical and pathologic changes in fetal or newborn mice,  
225 e.g., testicular degeneration.<sup>15, 18</sup> Our method is also inexpensive (<0.5 US dollar per  
226 PCR assay), high capacity (up to 96 samples per assay), and easy to perform. Moreover,  
227 only 2 ng of DNA and 20 ng of RNA was sufficient to obtain reliable results (Fig. 3),  
228 suggesting that less than 0.2 mg of tissue or 1  $\mu$ l of peripheral blood would be a  
229 sufficient sample, further revealing its utility, especially for the detection of fetal or  
230 newborn mice.

231 An ideal assay for *Sry* identification should only yield a product from male mouse  
232 samples with *Sry* but not from female mouse samples without *Sry*, so that we can  
233 identify male mouse samples directly by their amplification profiles. In practice,

---

234 however, non-specific amplicons derived from paralogous sequences and/or primer  
235 dimers were difficult to eliminate from reactions with female mouse samples. Because  
236 of this, melting profiles are more specific than the amplification profiles since the  
237 melting profiles of the *Sry* amplicons could be readily differentiated from those of  
238 non-specific amplicons (Fig. 3A). The amount of DNA template used plays an  
239 important role in the melting profiles, and 2 ng was confirmed to be an optimal amount  
240 of template in our study (Fig. 3A). However, if different PCR reagents are used, the  
241 optimal amount of DNA template should be re-evaluated.

242       Theoretically, after equalizing the DNA template input for the *Amelx* assay, samples  
243 with different *Amelx* copy numbers should generate different ranges of Cq values.  
244 Therefore, we could infer the *Amelx* copy number in a mouse sample by its Cq value. In  
245 practice, we confirmed this assumption (data not shown). However, to further diminish  
246 the potential impacts of slight differences (e.g., differences in the quantity or quality of  
247 the DNA template) between samples, *Actb* was used as a reference gene to calibrate the  
248 *Amelx* quantification. Accordingly, instead of ranges of Cq values, ranges of  $\Delta Cq_{Amelx - Actb}$   
249 values were established to quantify *Amelx* in unknown samples (Fig. 3C). Moreover,  
250 rather than using confidence intervals for the different ranges of  $\Delta Cq_{Amelx - Actb}$  values,  
251 we used a single cut-off value to determine the *Amelx* copy number (Fig. 3C), which  
252 simplified the data analysis.

253       The underlying principle of the assay used to determine Xist RNA transcript levels  
254 was identical to that of *Amelx* quantification. Similarly, a large amount of nucleic acid  
255 template had a repressive effect on PCR amplification (Fig. 3D). We further evaluated

---

256 whether the repressive effect was derived from the large amount of RNA or the resulting  
257 cDNA. The results suggested that the repressive effect was greater for large amounts of  
258 RNA (data not shown). Therefore, a smaller amount of RNA was preferable for reverse  
259 transcription, which was sufficient to reliably determine Xist RNA transcript levels (Fig.  
260 3E).

261 In conclusion, we developed three PCR-based assays for facilitating the breeding  
262 and study of KS mouse models. Our method is rapid, inexpensive, high capacity, easy to  
263 perform, and requires small amounts of sample. We confirmed the utility of our assays  
264 for the successful generation of KS mouse models. We believe our method will advance  
265 the knowledge of the pathologic mechanism of KS.

#### 266 **Authors' Contributions**

267 HXZ, WYX and YLZ participated in study design and the establishment of PCR assays.  
268 XLC, JYJ, XMZ, ZGW, and RQK participated in breeding of KS mouse models. QWG  
269 conceived of the study, and participated in its design and coordination and draft the  
270 manuscript. All authors have read and approved the final version of the manuscript, and  
271 agree with the order of presentation of the authors.

#### 272 **Acknowledgements**

273 We thank the Experimental Teaching Department, School of Medicine, Xiamen  
274 University and the Xiamen University Laboratory Animal Center for their kind supports  
275 to this study.

#### 276 **Conflict of Interest**

277 None of the authors declare competing financial interests.

---

## 278 **References**

- 279 1. Klinefelter HF, Reifenstein, E.C., Albright, F. Syndrome characterized by gynecomastia  
280 aspermatogenesis without A-Leydigism and increased excretion of follicle stimulating hormone. *J Clin*  
281 *Endocrinol Metab* 1942; **2**: 615-27.
- 282 2. Berglund A, Stochholm K, Gravholt CH. The epidemiology of sex chromosome abnormalities. *Am J*  
283 *Med Genet C Semin Med Genet* 2020; **184**: 202-15.
- 284 3. Forti G, Corona G, Vignozzi L, Krausz C, Maggi M. Klinefelter's syndrome: a clinical and  
285 therapeutical update. *Sex Dev* 2010; **4**: 249-58.
- 286 4. Gravholt CH, Chang S, Wallentin M, Fedder J, Moore P, et al. Klinefelter Syndrome: Integrating  
287 Genetics, Neuropsychology, and Endocrinology. *Endocr Rev* 2018; **39**: 389-423.
- 288 5. Fu DM, Zhou YL, Zhao J, Hu P, Xu ZF, et al. Rapid screening for Klinefelter syndrome with a  
289 simple high-resolution melting assay: a multicenter study. *Asian J Androl* 2018; **20**: 349-54.
- 290 6. Pizzocaro A, Vena W, Condorelli R, Radicioni A, Rastrelli G, et al. Testosterone treatment in male  
291 patients with Klinefelter syndrome: a systematic review and meta-analysis. *J Endocrinol Invest* 2020; **43**:  
292 1675-87.
- 293 7. Graham JM, Jr., Bashir AS, Stark RE, Silbert A, Walzer S. Oral and written language abilities of  
294 XXY boys: implications for anticipatory guidance. *Pediatrics* 1988; **81**: 795-806.
- 295 8. Gies I, Unuane D, Velkeniers B, De Schepper J. Management of Klinefelter syndrome during  
296 transition. *Eur J Endocrinol* 2014; **171**: R67-77.
- 297 9. Skakkebaek A, Wallentin M, Gravholt CH. Neuropsychology and socioeconomic aspects of  
298 Klinefelter syndrome: new developments. *Curr Opin Endocrinol Diabetes Obes* 2015; **22**: 209-16.
- 299 10. Tournaye H, Krausz C, Oates RD. Concepts in diagnosis and therapy for male reproductive

- 
- 300 impairment. *Lancet Diabetes Endocrinol* 2017; **5**: 554-64.
- 301 11. Gravholt CH, Tartaglia N, Distechi C. Sex chromosome aneuploidies in 2020-The state of care and  
302 research in the world. *Am J Med Genet C Semin Med Genet* 2020; **184**: 197-201.
- 303 12. Wistuba J, Beumer C, Brehm R, Gromoll J. 41,XX(Y) \* male mice: An animal model for Klinefelter  
304 syndrome. *Am J Med Genet C Semin Med Genet* 2020; **184**: 267-78.
- 305 13. Eicher EM, Hale DW, Hunt PA, Lee BK, Tucker PK, et al. The mouse Y\* chromosome involves a  
306 complex rearrangement, including interstitial positioning of the pseudoautosomal region. *Cytogenet Cell*  
307 *Genet* 1991; **57**: 221-30.
- 308 14. Cox KH, Bonthuis PJ, Rissman EF. Mouse model systems to study sex chromosome genes and  
309 behavior: relevance to humans. *Front Neuroendocrinol* 2014; **35**: 405-19.
- 310 15. Lue Y, Jentsch JD, Wang C, Rao PN, Hikim AP, et al. XXY mice exhibit gonadal and behavioral  
311 phenotypes similar to Klinefelter syndrome. *Endocrinology* 2005; **146**: 4148-54.
- 312 16. Wistuba J, Luetjens CM, Stukenborg JB, Poplinski A, Werler S, et al. Male 41, XXY\* mice as a  
313 model for klinefelter syndrome: hyperactivation of leydig cells. *Endocrinology* 2010; **151**: 2898-910.
- 314 17. Lee JJ, Warburton D, Robertson EJ. Cytogenetic methods for the mouse: preparation of  
315 chromosomes, karyotyping, and in situ hybridization. *Anal Biochem* 1990; **189**: 1-17.
- 316 18. Hunt PA, Worthman C, Levinson H, Stallings J, LeMaire R, et al. Germ cell loss in the XXY male  
317 mouse: altered X-chromosome dosage affects prenatal development. *Mol Reprod Dev* 1998; **49**: 101-11.
- 318 19. Vernet N, Mahadevaiah SK, Yamauchi Y, Decarpentrie F, Mitchell MJ, et al. Mouse Y-linked Zfy1  
319 and Zfy2 are expressed during the male-specific interphase between meiosis I and meiosis II and promote  
320 the 2nd meiotic division. *PLoS Genet* 2014; **10**: e1004444.
- 321 20. Wolstenholme JT, Rissman EF, Bekiranov S. Sexual differentiation in the developing mouse brain:

- 
- 322 contributions of sex chromosome genes. *Genes Brain Behav* 2013; **12**: 166-80.
- 323 21. Bustin SA, Benes V, Garson JA, Hellemans J, Huggett J, et al. The MIQE guidelines: minimum  
324 information for publication of quantitative real-time PCR experiments. *Clin Chem* 2009; **55**: 611-22.
- 325 22. Guo Q, Zhou Y, Wang X, Li Q. Simultaneous detection of trisomies 13, 18, and 21 with multiplex  
326 ligation-dependent probe amplification-based real-time PCR. *Clin Chem* 2010; **56**: 1451-9.
- 327 23. Keeney S. Meiosis. Volume 2, cytological methods. Preface. *Methods Mol Biol* 2009; **558**: v-vi.
- 328 24. Committee for the Update of the Guide for the Care and Use of Laboratory Animals. Guide for the  
329 Care and Use of Laboratory Animals, 8th ed. *Washington (DC): National Academies Press (US)* 2011.
- 330 25. Guo Q, Lan F, Xu L, Jiang Y, Xiao L, et al. Quadruplex real-time polymerase chain reaction assay  
331 for molecular diagnosis of Y-chromosomal microdeletions. *Fertil Steril* 2012; **97**: 864-9.
- 332 26. Guo Q, Xiao L, Zhou Y. Rapid diagnosis of aneuploidy by high-resolution melting analysis of  
333 segmental duplications. *Clin Chem* 2012; **58**: 1019-25.
- 334 27. Xia Z, Zhou Y, Fu D, Wang Z, Ge Y, et al. Carrier screening for spinal muscular atrophy with a  
335 simple test based on melting analysis. *J Hum Genet* 2019; **64**: 387-96.
- 336 28. Zhou Y, Xu W, Jiang Y, Xia Z, Zhang H, et al. Clinical Utility of a High-Resolution Melting Test for  
337 Screening Numerical Chromosomal Abnormalities in Recurrent Pregnancy Loss. *J Mol Diagn* 2020; **22**:  
338 523-31.
- 339
- 340



---

341 **Table 1. Primer information of PCR-based assays.**

---

| Target gene  | Primer sequence                                        | Amplification region<br>(assembly: GRCm39/mm39) |
|--------------|--------------------------------------------------------|-------------------------------------------------|
| <i>Sry</i>   | F: GCAGCTTACCTACTTACTAACA<br>R: CTGAGGTGCTCCTGGTA      | chrY:2662499-2662564                            |
| <i>Amelx</i> | F: CCTTCAGCCTCATCACCA<br>R: TTGGGTTGGAGTCATGGA         | chrX:167965017-167965122                        |
| <i>Xist</i>  | F: CATCCTACCATCATCTGCTTT<br>R: GGAAGATGACTCCAGTCT      | chrX:102504207-102504284                        |
| <i>Actb</i>  | F: CCATGAAACTACATTCAATTCCAT<br>R: TGTGTTGGCATAGAGGTCTT | chr5:142889915-142889984                        |

---

342

343

---

344 **Figure 1. Breeding of Klinefelter syndrome (KS) mouse models.** The mouse in the  
345 blue circle is a 40,XX<sup>Y\*</sup> mouse, i.e., one of the KS mouse models. The mice in the red  
346 circles are the target mice in each generation for breeding 41,XXY mice, i.e., another  
347 KS mouse model. This figure was modified from figures in a previous study (Front  
348 Neuroendocrinol 2014; 35: 405-19). NPX: non-pseudoautosomal region of the X  
349 chromosome; NRY: non-recombining region of the Y chromosome; PAR:  
350 pseudoautosomal region.

351

---

352 **Figure 2. Genetic information of the mouse breeds obtained during the breeding of**  
353 **Klinefelter syndrome mouse models.** +: presence of *Sry* or a high Xist RNA transcript  
354 level; -: absence of *Sry* or low/no Xist RNA transcript. Pink labels indicate the target  
355 mice in each generation for the breeding of 41,XXY mice. Green labels indicate the  
356 assays required to identify the target mice in each generation. For example, in the  
357 second generation, each mouse was first tested for *Sry*, and those negative for *Sry* were  
358 further tested for Xist RNA transcript levels. Mice with low/no Xist RNA transcript, i.e.,  
359 negative results in both assays, were identified as 40,XY\*<sup>X</sup> mice.  
360

---

361 **Figure 3. PCR-based assays for the breeding of Klinefelter syndrome mouse**  
362 **models.** (a) Melting profiles for detecting *Sry* using different amounts of DNA template.  
363 (b) Assays to quantify *Amelx* using different amounts of DNA template. (c) Establishing  
364 a cut-off value for *Amelx* quantification. (d) Assays for evaluating Xist RNA transcript  
365 levels using different amounts of RNA template. (e) Establishing a cut-off value for Xist  
366 RNA quantification. Each sample was tested in triplicate, and the Cq value of each  
367 sample is the mean Cq value of three replicates. NTC: no template control.  
368

---

369 **Figure 4. Karyotypes of the target mice for breeding Klinefelter syndrome mouse**  
370 **models.** (a) A 40,XX<sup>Y\*</sup> mouse from the second generation. The arrow indicates the X<sup>Y\*</sup>  
371 chromosome. (b) A 40,XY<sup>X\*</sup> mouse from the second generation. The arrow indicates the  
372 Y<sup>X\*</sup> chromosome. (c) A 41,XY<sup>Y\*</sup> mouse from the third generation. The arrow  
373 indicates the Y<sup>x\*</sup> chromosome. (d) A 41,XXY mouse from the fourth generation.  
374

---

375 **Figure 5. Testicular phenotypes of Klinefelter syndrome mouse models.** (a-c)  
376 Respective appearance, anatomic analysis, and histologic analysis of the testes of a  
377 40,XX<sup>Y\*</sup> mouse and 40,X<sup>Y\*</sup> littermate. (d-f) Respective appearance, anatomic analysis,  
378 and histologic analysis of the testes of a 41,XXY mouse and 40,XY littermate. The  
379 arrows indicate the position of the testes. As expected, the 40,XX<sup>Y\*</sup> and 41,XXY mice  
380 presented small, firm testes. Moreover, the tubule diameters of 40,X<sup>Y\*</sup> and 41,XXY  
381 mice were smaller than those of their reference littermates, germ cells were absent, and  
382 only Sertoli cells were observed within the tubules.

### First crossbreeding

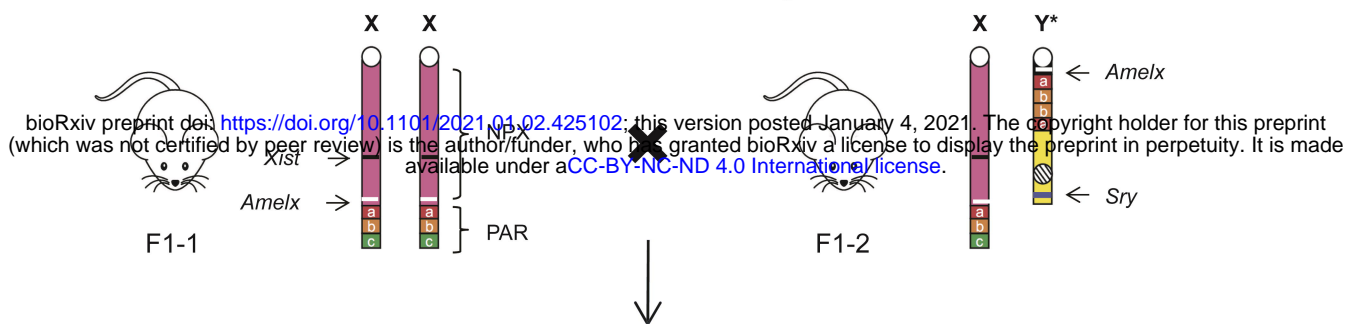

### Second crossbreeding

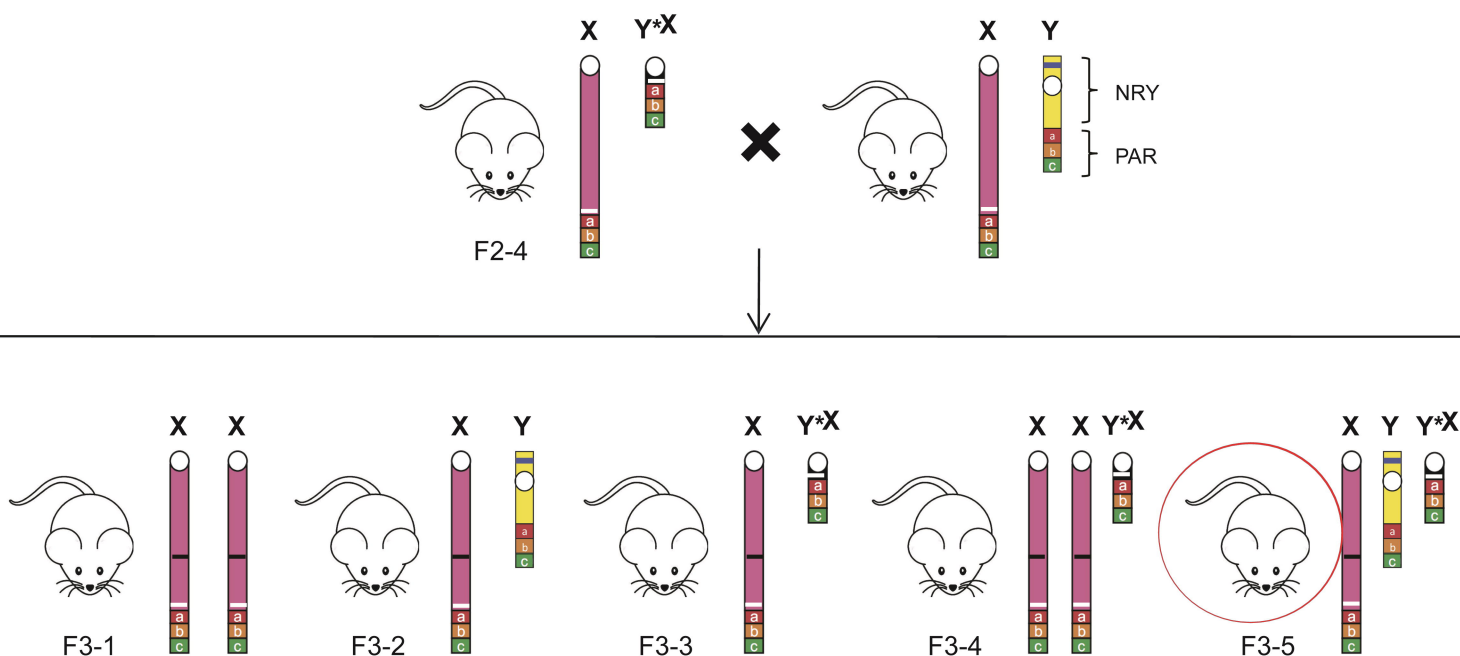

### Third crossbreeding

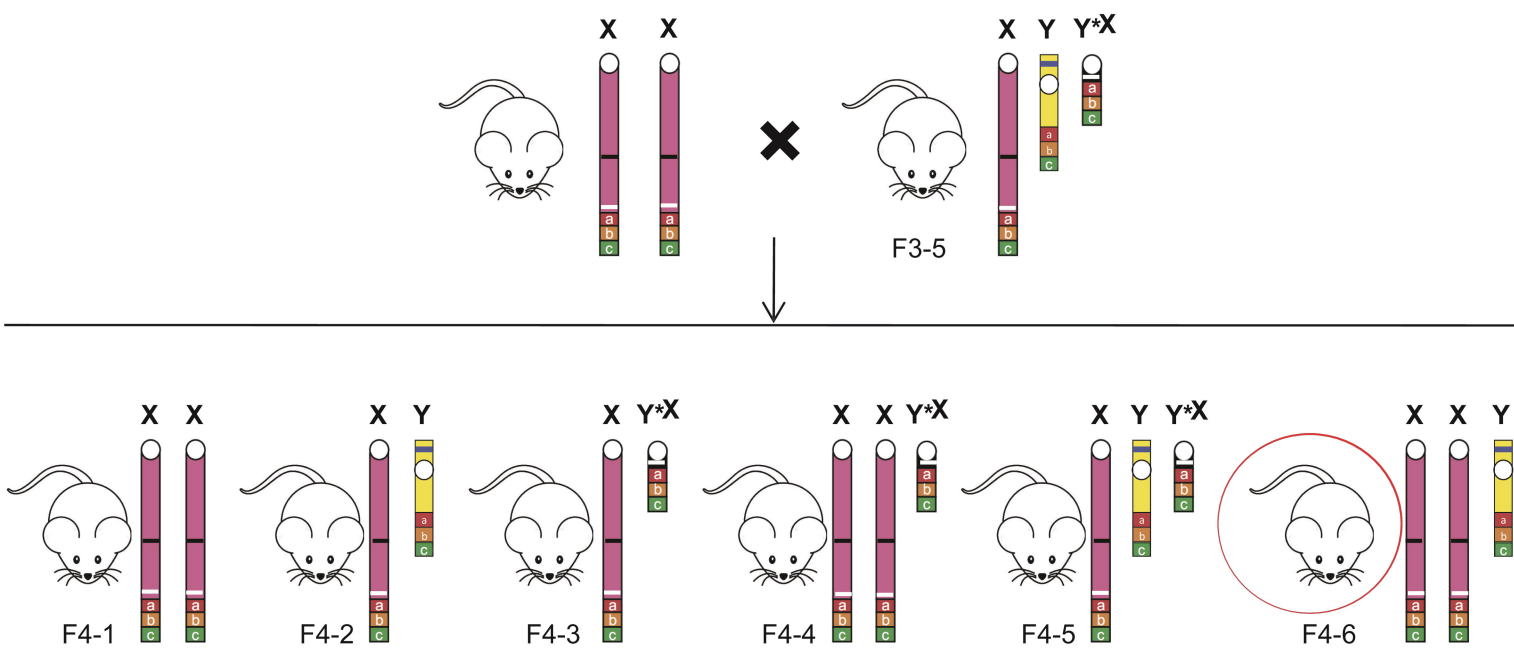

| Breed            | F2-1   | F2-2    | F2-3                 | F2-4                 |
|------------------|--------|---------|----------------------|----------------------|
| <b>Karyotype</b> | 40, XX | 40, XY* | 40, XX <sup>Y*</sup> | 40, XY <sup>*X</sup> |
| <i>Sry</i>       | -      | +       | +                    | -                    |
| <i>Amelx</i>     | 2      | 2       | 2                    | 2                    |
| <b>Xist RNA</b>  | +      | -       | +                    | -                    |

| Breed            | F3-1   | F3-2   | F3-3                 | F3-4                  | F3-5                  |
|------------------|--------|--------|----------------------|-----------------------|-----------------------|
| <b>Karyotype</b> | 40, XX | 40, XY | 40, XY <sup>*X</sup> | 41, XXY <sup>*X</sup> | 41, XYY <sup>*X</sup> |
| <i>Sry</i>       | -      | +      | -                    | -                     | +                     |
| <i>Amelx</i>     | 2      | 1      | 2                    | 3                     | 2                     |
| <b>Xist RNA</b>  | +      | -      | -                    | +                     | -                     |

| Breed            | F4-1   | F4-2   | F4-3                 | F4-4                  | F4-5                  | F4-6    |
|------------------|--------|--------|----------------------|-----------------------|-----------------------|---------|
| <b>Karyotype</b> | 40, XX | 40, XY | 40, XY <sup>*X</sup> | 41, XXY <sup>*X</sup> | 41, XYY <sup>*X</sup> | 41, XXY |
| <i>Sry</i>       | -      | +      | -                    | -                     | +                     | +       |
| <i>Amelx</i>     | 2      | 1      | 2                    | 3                     | 2                     | 2       |
| <b>Xist RNA</b>  | +      | -      | -                    | +                     | -                     | +       |



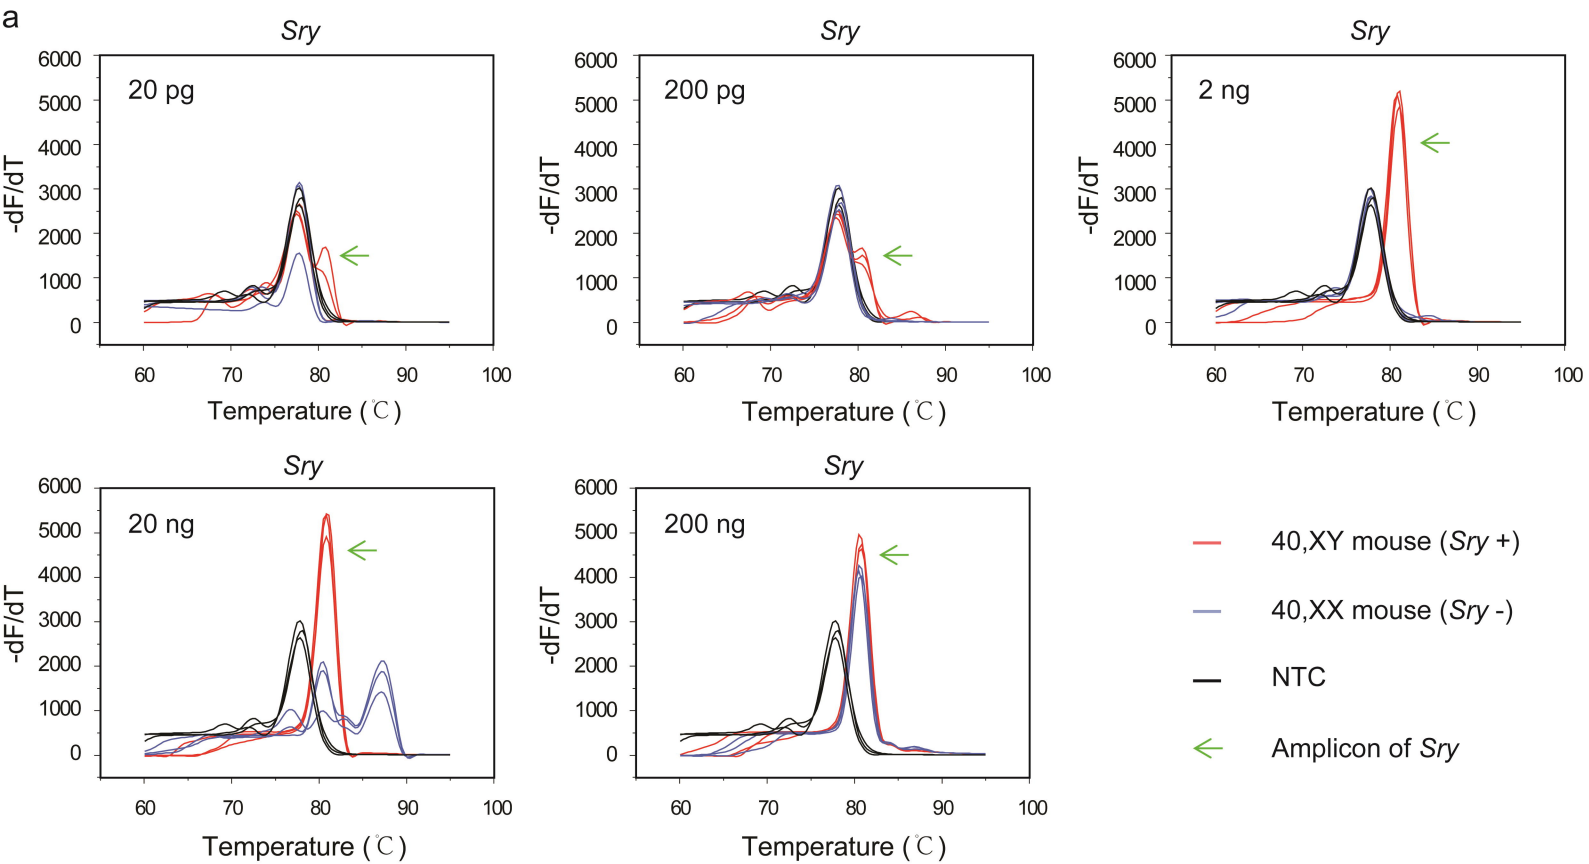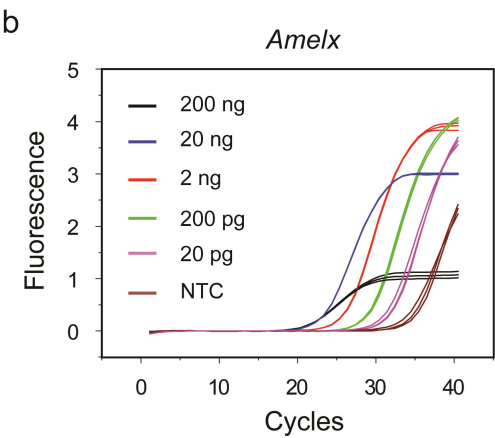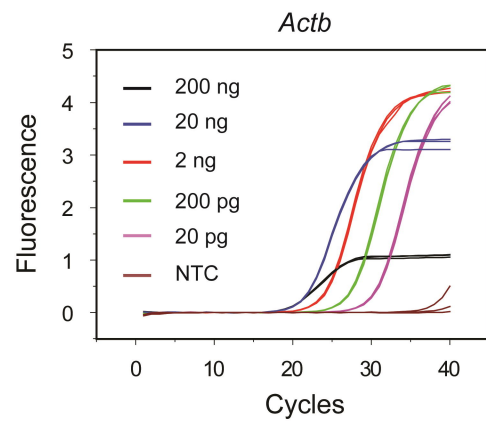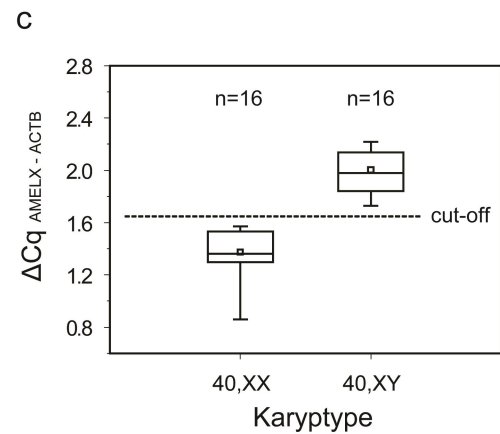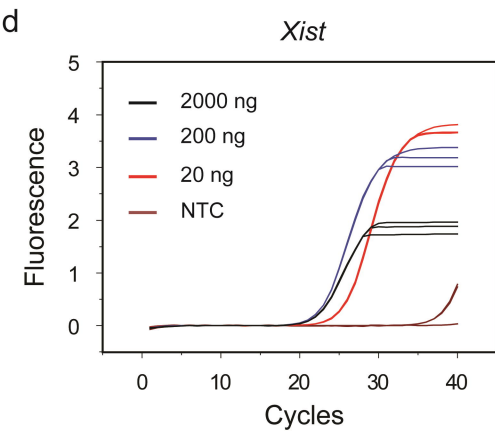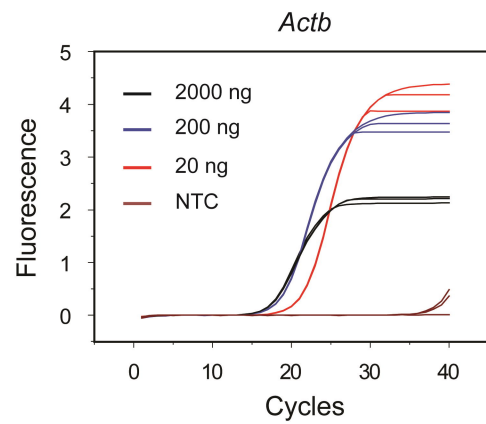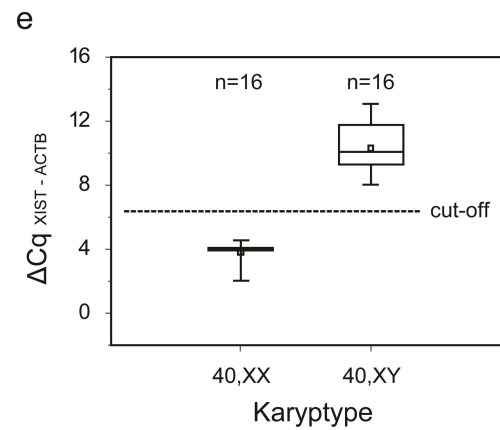

a

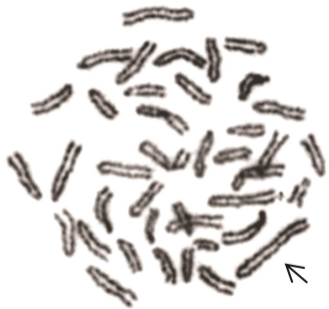

b

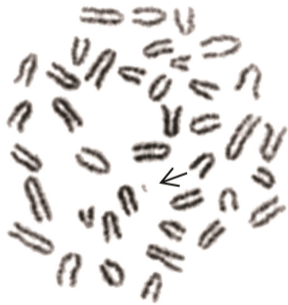

c

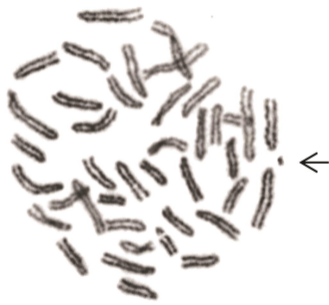

d

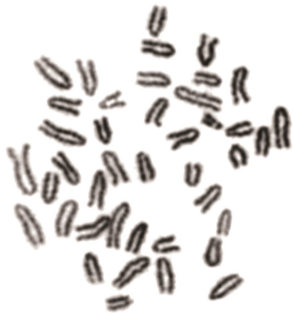

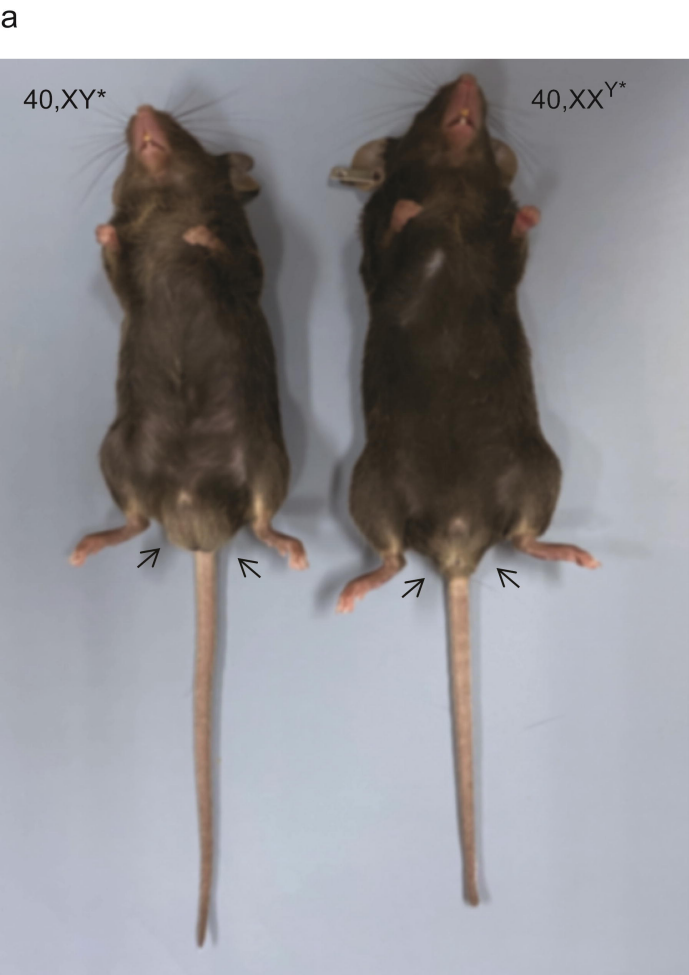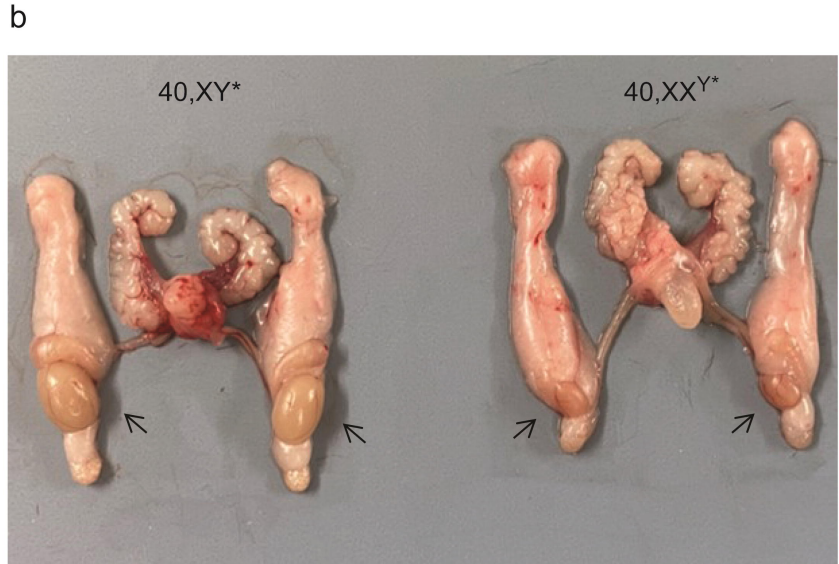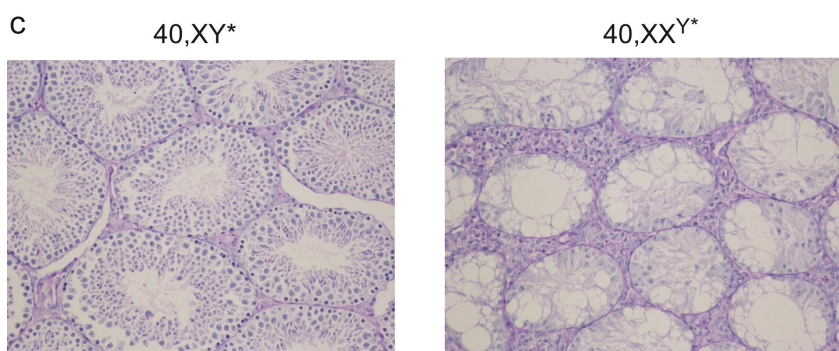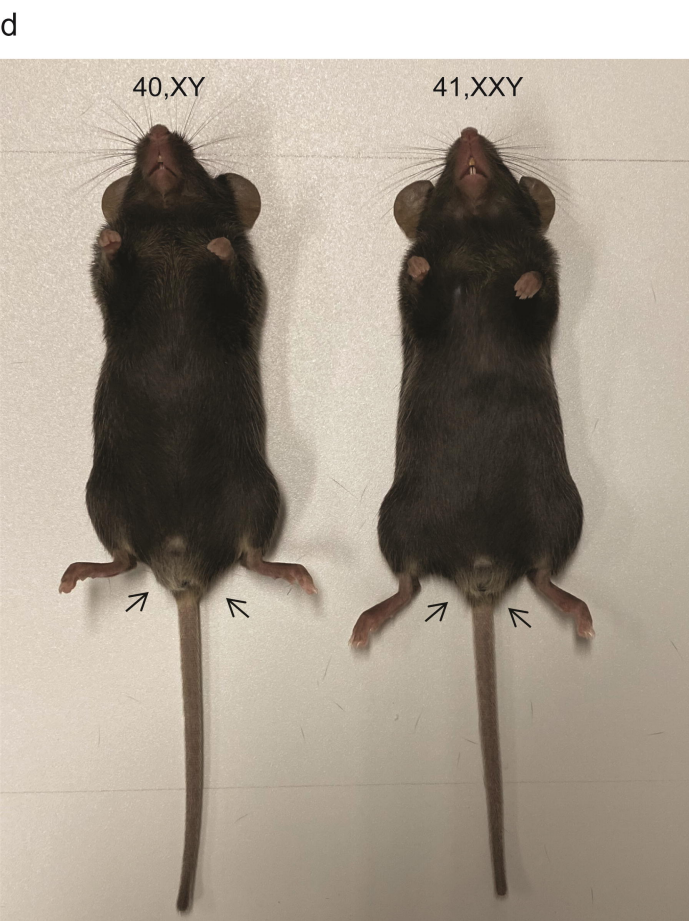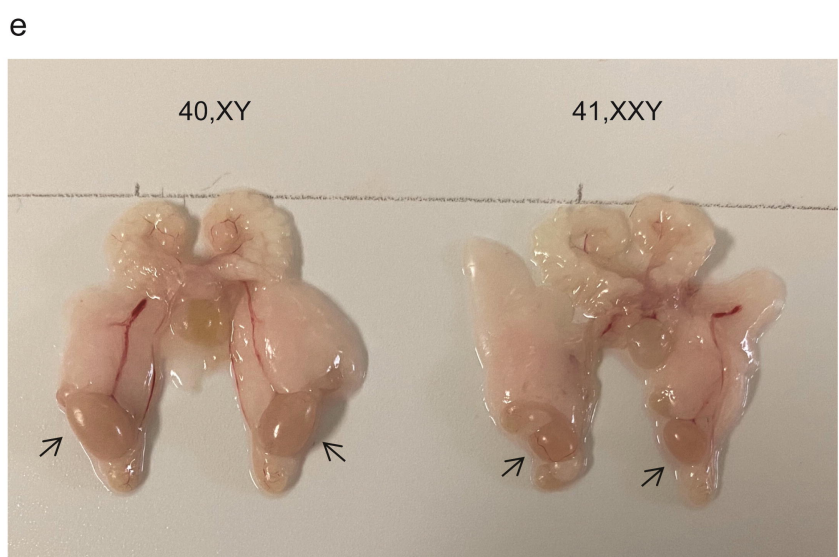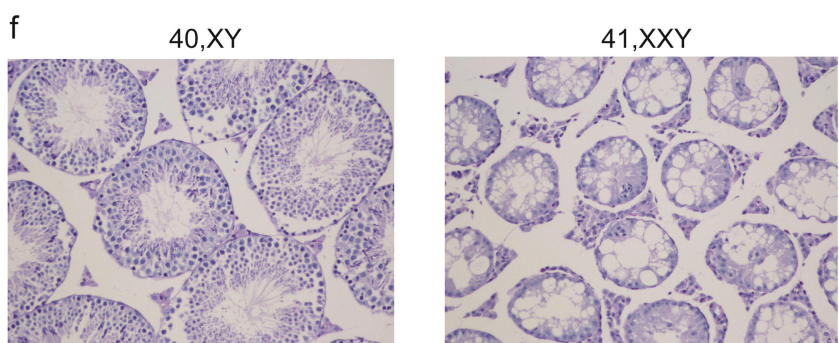

Source: http://biorxiv.org/content/10.1101/2021.01.02.425102v1.full.pdf
